# Supplementary material for: Enhancement of the anomalous Hall effect via interfacial scattering in thick Fe nanocluster-assembled thin films
Source: Royal Society of Chemistry journal article supplement (doi:10.1039/d5cp01845e), 2025-01-01
Supplement: d5cp01845e1.pdf [file d5cp01845e1.pdf]

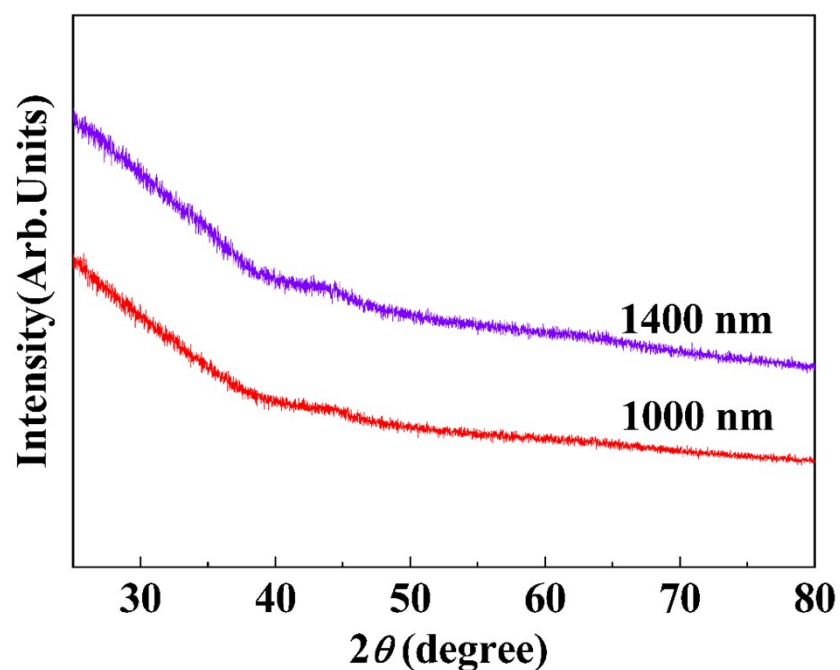

**Fig. S1.** XRD patterns of Fe nanocluster-assembled thin films with thicknesses of 1000nm and 1400nm

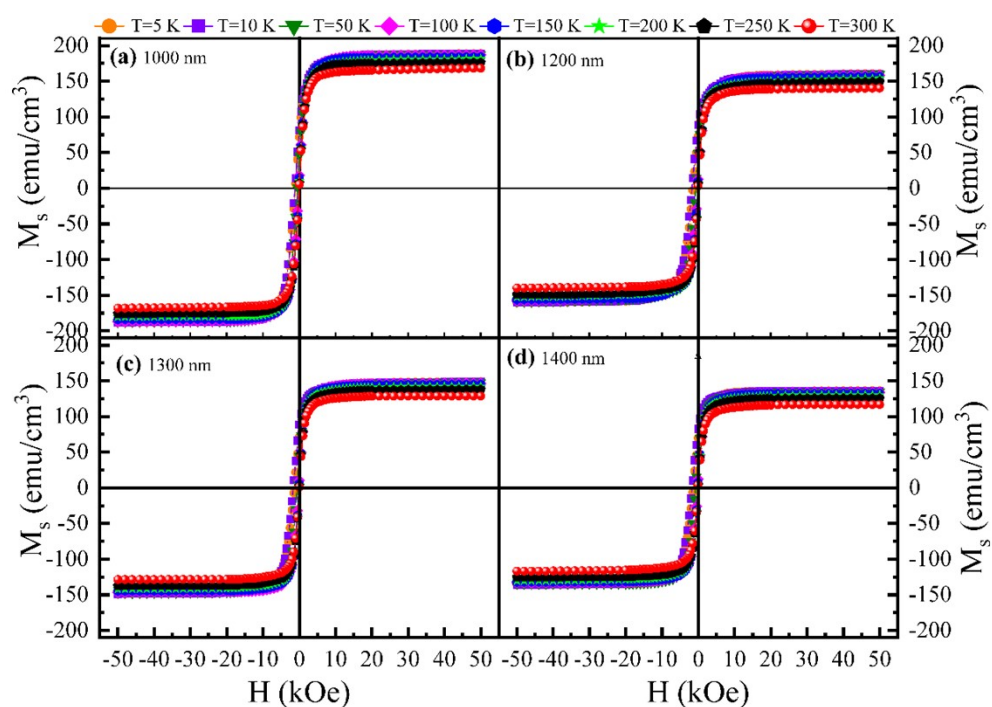

**Fig. S2.**  $M$ - $H$  curves of the Fe nanocluster-assembled films with different thickness measured at different temperature:  
(a) 1000 nm, (b) 1200 nm, (c) 1300 nm, (d) 1400 nm.
